of Potential Conflicts of Interest. Conflicts that the editors consider relevant to the content of the manuscript have been disclosed.

**Sumeet R. Dhawan and Naveen Sankhyan**

Department of Pediatrics, Postgraduate Institute of Medical Education and Research, Chandigarh, India

## References

1. Marais BJ, Heemskerk AD, Marais SS, et al. Standardized methods for enhanced quality and comparability of tuberculous meningitis studies. *Clin Infect Dis* 2016; 64: 501–9.
2. Dhawan SR, Gupta A, Singhi P, Sankhyan N, Malhi P, Khandelwal N. Predictors of neurological outcome of tuberculous meningitis in childhood: a prospective cohort study from a developing country. *J Child Neurol* 2016; 31:1622–7.
3. Figaji AA, Fieggen AG. The neurosurgical and acute care management of tuberculous meningitis: evidence and current practice. *Tuberculosis (Edinb)* 2010; 90:393–400.
4. Patel VB, Burger I, Connolly C. Temporal evolution of cerebrospinal fluid following initiation of treatment for tuberculous meningitis. *S Afr Med J* 2008; 98:610–3.
5. Savardekar A, Chatterji D, Singhi S, Mohindra S, Gupta S, Chhabra R. The role of ventriculoperitoneal shunt placement in patients of tubercular meningitis with hydrocephalus in poor neurological grade: a prospective study in the pediatric population and review of literature. *Childs Nerv Syst* 2013; 29:719–25.

Correspondence: N. Sankhyan, Department of Pediatrics, Postgraduate Institute of Medical Education and Research, Chandigarh, India 160012 ([drnsankhyan@yahoo.co.in](mailto:drnsankhyan@yahoo.co.in)).

**Clinical Infectious Diseases®** 2017;64(12):1804–5

© The Author 2017. Published by Oxford University Press for the Infectious Diseases Society of America. All rights reserved. For permissions, e-mail: [journals.permissions@oup.com](mailto:journals.permissions@oup.com). DOI: 10.1093/cid/cix309

## Reply to Dhawan and Sankhyan

TO THE EDITOR—The comments made by Dhawan and Sankhyan confirm the need for standardized methodological approaches to enhance the quality and comparability of tuberculous meningitis (TBM) studies [1, 2]. However, achieving

consensus on which data points should be included in a standardized core dataset can be challenging. We adhered to 4 guiding principles in drafting this framework:

1. Restrict the core dataset to the minimal number of elements necessary for enhanced study quality and comparability. The dataset should encourage TBM research that meets minimal quality standards, without presenting a cumbersome hurdle that could discourage research.
2. Differentiate “essential” from “desirable” datapoints to assist agreement on a core or “must have” data, while retaining flexibility and acknowledging that different settings and studies have different data requirements.
3. Focus on data that are available in most tuberculosis-endemic settings, or are considered of fundamental importance for the conduct of meaningful TBM research.
4. Include the data points necessary for accurate case characterization and disease description, according to a previously published uniform case definition for TBM research [3].

Dhawan and Sankhyan raise a number of important issues with respect to the diagnosis and management of TBM, many of which were discussed by the consortium when defining the core dataset. We respectfully believe that the suggested variables are “desirable,” rather than “essential.” We maintain that it is important to retain the simplest core dataset possible in order to encourage wide uptake and strict

adherence to the essential core dataset. We emphasize, however, that although we do not wish to make changes to the currently published version, we will consider future changes and additions to the dataset as experience grows of its use and when new research technologies or questions arise.

## Note

**Potential conflicts of interest.** All authors: No reported conflicts of interest. All authors have submitted the ICMJE Form for Disclosure of Potential Conflicts of Interest. Conflicts that the editors consider relevant to the content of the manuscript have been disclosed.

**Ben J. Marais,<sup>1</sup> Doortje Heemskerk,<sup>2,3</sup> and Guy E. Thwaites<sup>2,3</sup>, for the Tuberculous Meningitis International Research Consortium**

<sup>1</sup>Marie Bashir Institute for Infectious Diseases and Biosecurity and The Children’s Hospital at Westmead, University of Sydney, Australia; <sup>2</sup>Oxford University Clinical Research Unit, Ho Chi Minh City, Vietnam; and <sup>3</sup>Nuffield Department of Medicine, Centre for Tropical Medicine and Global Health, University of Oxford, United Kingdom

## References

1. Dhawan SR, Sankhyan N. Additional details for improved reporting of tuberculous meningitis studies. *Clin Infect Dis* 2017; 64:1804–5.
2. Marais BJ, Heemskerk AD, Marais SS, et al; Tuberculous Meningitis International Research Consortium. Standardized methods for enhanced quality and comparability of tuberculous meningitis studies. *Clin Infect Dis* 2017; 64:501–9.
3. Marais S, Thwaites G, Schoeman JF, et al. Tuberculous meningitis: a uniform case definition for use in clinical research. *Lancet Infect Dis* 2010; 10:803–12.

Correspondence: G. E. Thwaites, Oxford University Clinical Research Unit, 764 Vo Van Kiet, Quan 5, Ho Chi Minh City, Vietnam ([gthwaites@oucr.org](mailto:gthwaites@oucr.org)).

**Clinical Infectious Diseases®** 2017;64(12):1805

© The Author 2017. Published by Oxford University Press for the Infectious Diseases Society of America. All rights reserved. For permissions, e-mail: [journals.permissions@oup.com](mailto:journals.permissions@oup.com). DOI: 10.1093/cid/cix305
